# Supplementary material for: Optical properties and energy transfer of a novel KSrSc2(PO4)3:Ce3+/Eu2+/Tb3+ phosphor for white light emitting diodes
Source: Royal Society of Chemistry journal article supplement (doi:10.1039/c4dt03906h), 2015-01-01
Supplement: c4dt03906h1.pdf [file c4dt03906h1.pdf]

## **Supporting Information**

**Title:** Optical Properties and Energy Transfer of Novel  $\text{KSrSc}_2(\text{PO}_4)_3:\text{Ce}^{3+}/\text{Eu}^{2+}/\text{Tb}^{3+}$

Phosphor for White Light Emitting Diodes

**Author(s):** Mengmeng Jiao<sup>a,b</sup>, Wenzhen Lv<sup>a,b</sup>, Wei Lü<sup>a</sup>, Qi Zhao<sup>a,b</sup>, Baiqi Shao<sup>a,b</sup>, and  
Hongpeng You<sup>a,\*</sup>

<sup>a</sup> State Key Laboratory of Rare Earth Resource Utilization, Changchun Institute of Applied Chemistry, Chinese Academy of Sciences, Changchun 130022, P. R. China.

<sup>b</sup> University of the Chinese Academy of Sciences, Beijing 100049, P. R. China.

\*Corresponding author: E-mail: [hpyou@ciac.ac.cn](mailto:hpyou@ciac.ac.cn) (H.Y.)

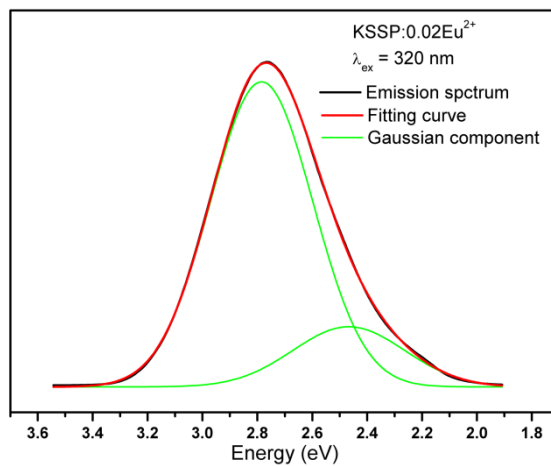

Figure S1. Emission spectrum of KSSP:0.02Eu<sup>2+</sup> and its Gaussian components on an energy scale.

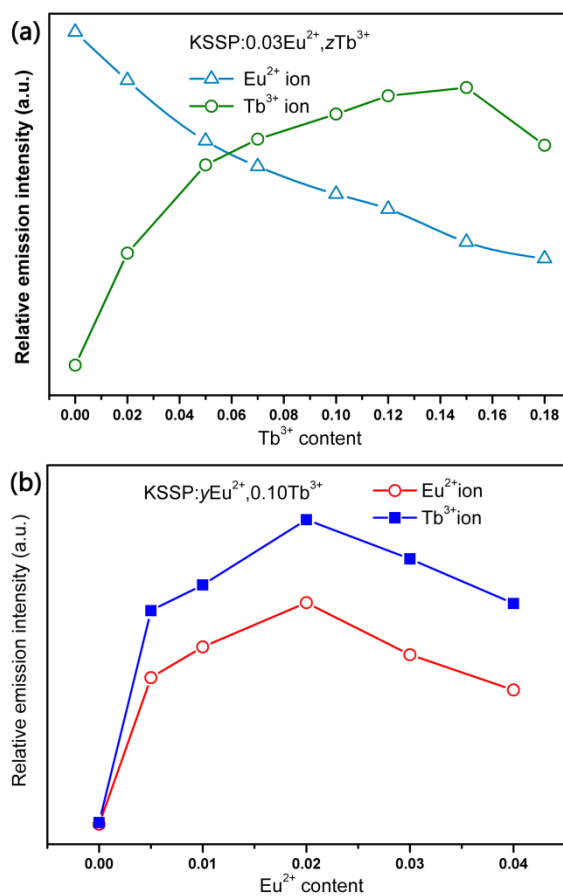

Figure S2. Dependence of Eu<sup>2+</sup> and Tb<sup>3+</sup> emission intensity on (a) Tb<sup>3+</sup> doping content in KSSP:0.03Eu<sup>2+</sup>,zTb<sup>3+</sup> (b) Eu<sup>2+</sup> doping content in KSSP:yEu<sup>2+</sup>,0.10Tb<sup>3+</sup> phosphor.

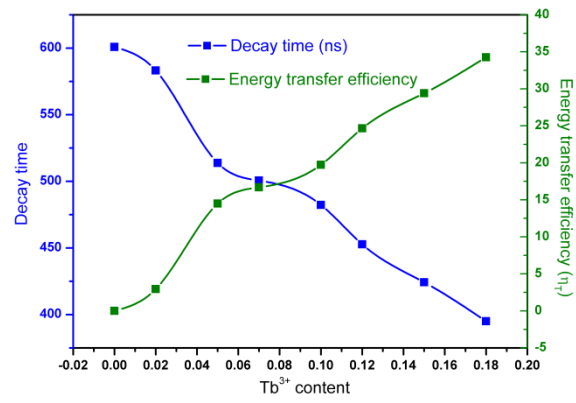

Figure S3. Decay lifetime for  $\text{Eu}^{2+}$  ions and energy transfer efficiency for  $\text{Eu}^{2+} \rightarrow \text{Tb}^{3+}$  in  $\text{KSSP}:0.03\text{Eu}^{2+},z\text{Tb}^{3+}$  ( $z = 0-0.18$ ) phosphors
